# Supplementary material for: Pan-Cancer Analysis of Mitochondria Chaperone-Client Co-Expression Reveals Chaperone Functional Partitioning
Source: MDPI journal article supplement (doi:10.3390/cancers12040825), 2020-03-30

# Breast Invasive Carcinoma Tissue Heatmap

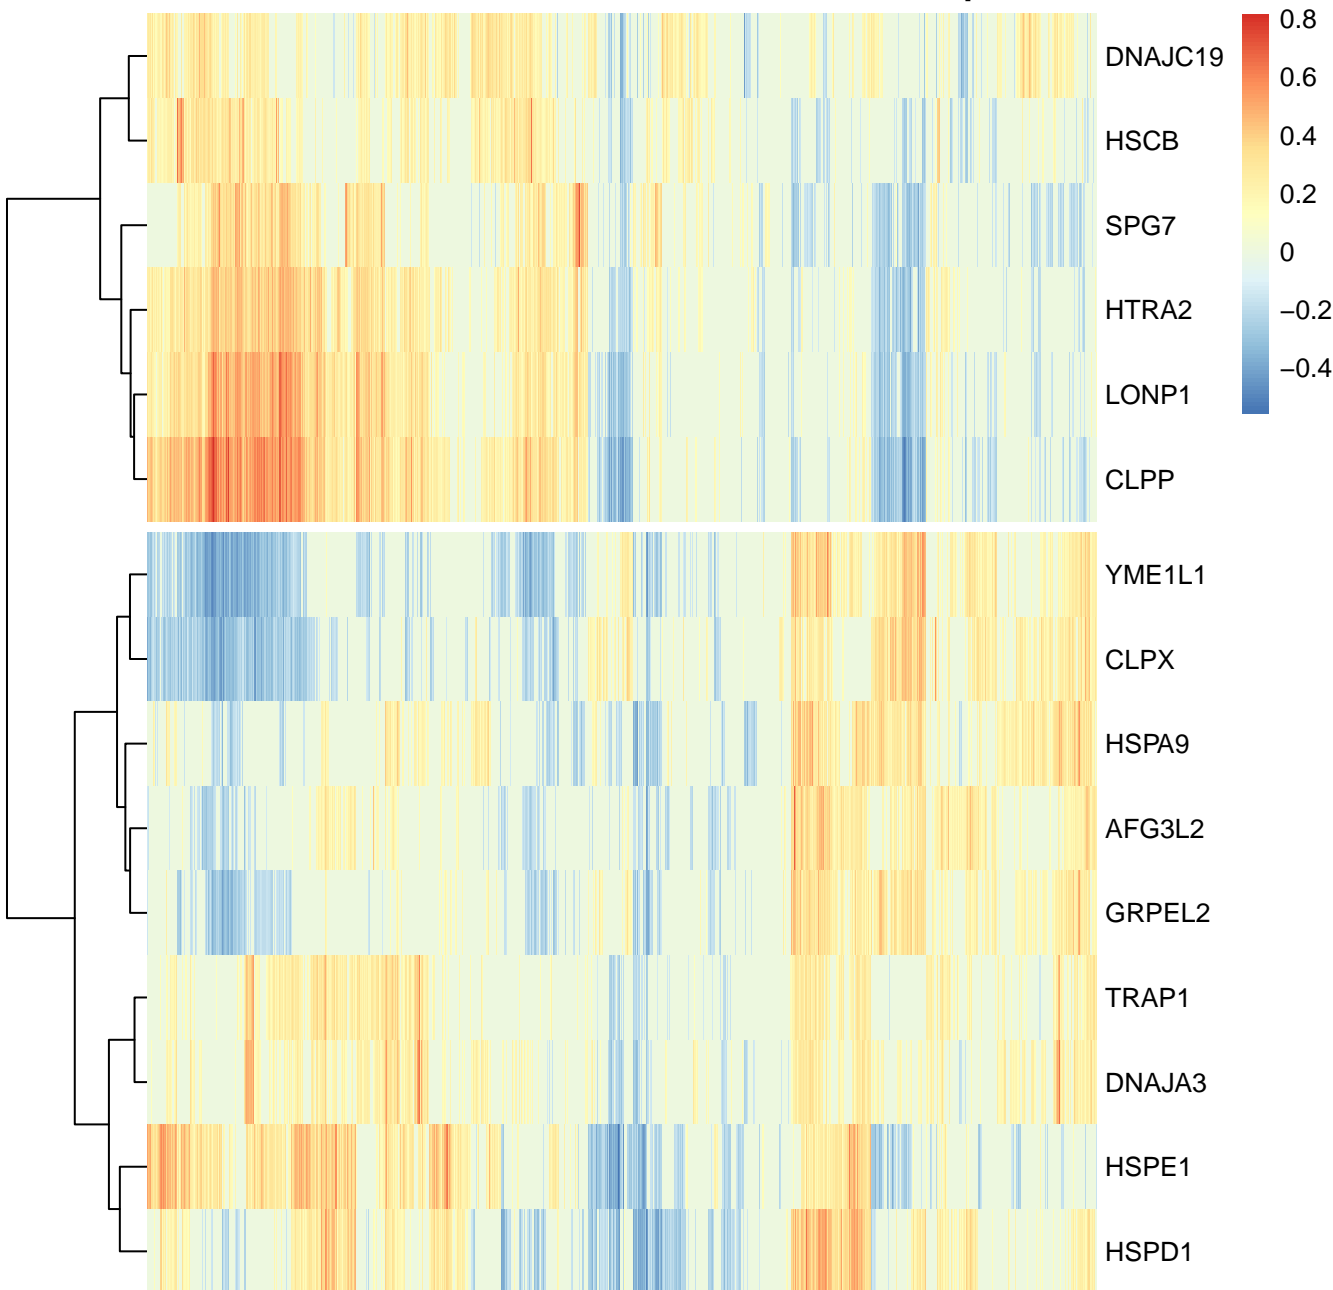

Colon\_Adenocarcinoma Tissue Heatmap

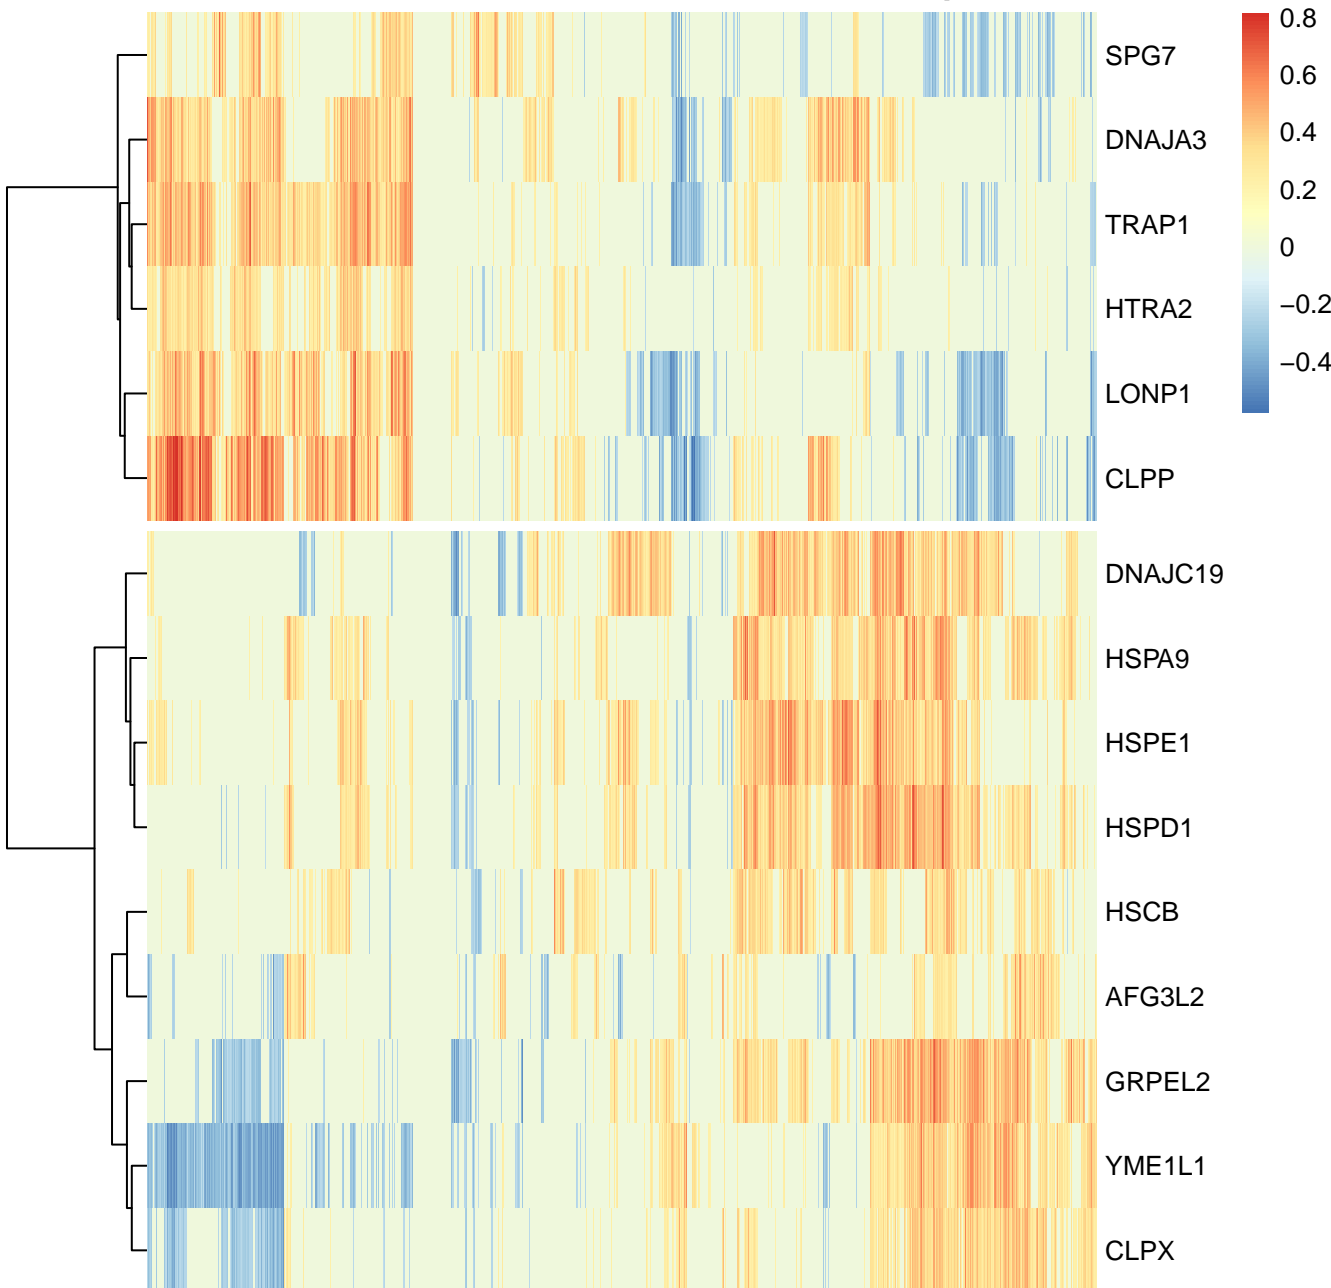

Head\_and\_Neck\_Squamous\_Cell\_Carcinoma Tissue Heatmap

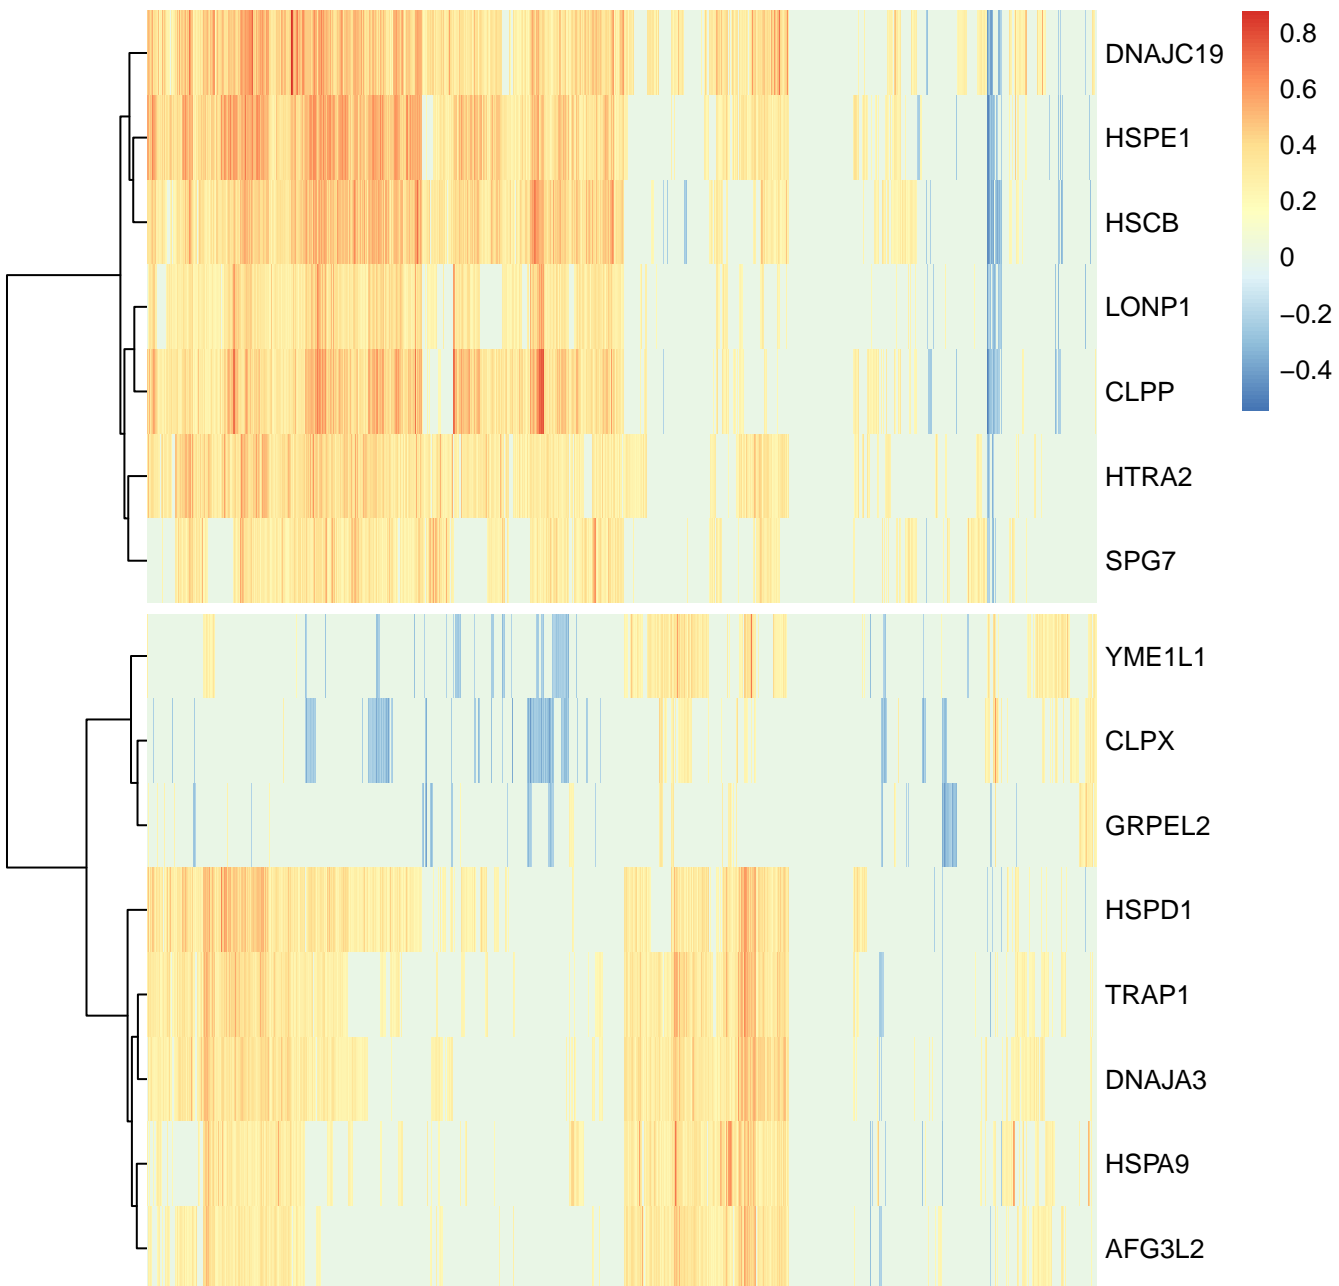

**Kidney\_Chromophobe Tissue Heatmap**

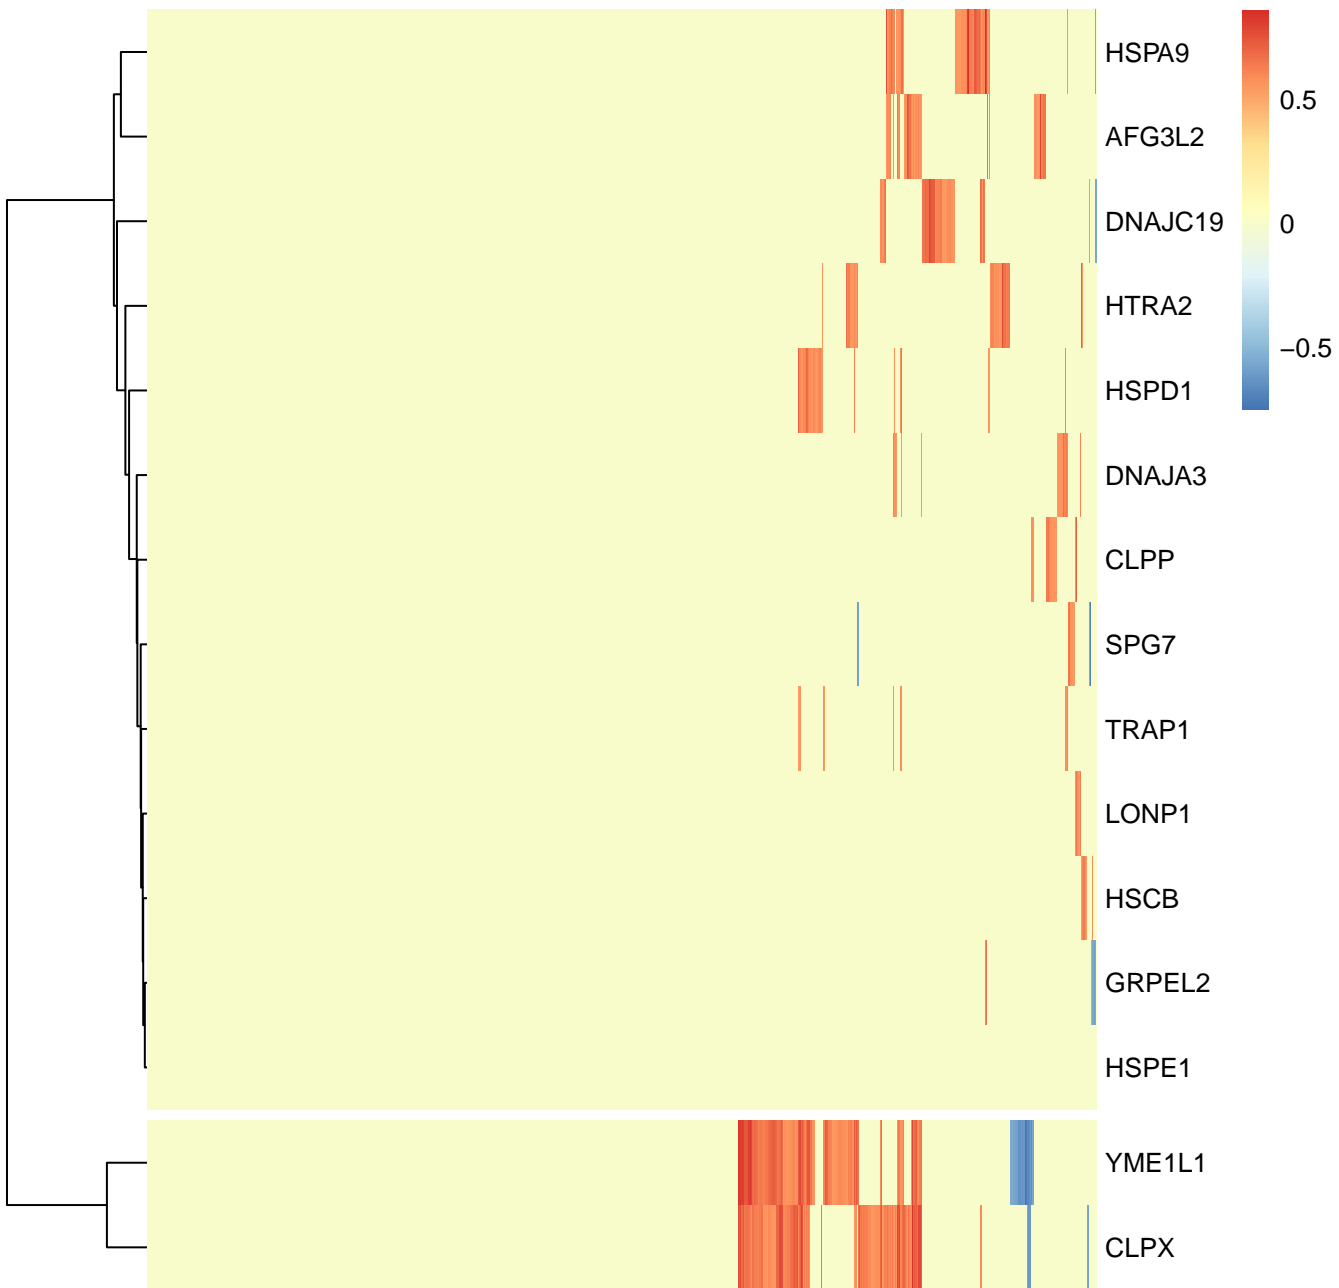

**Kidney\_Renal\_Clear\_Cell\_Carcinoma Tissue Heatmap**

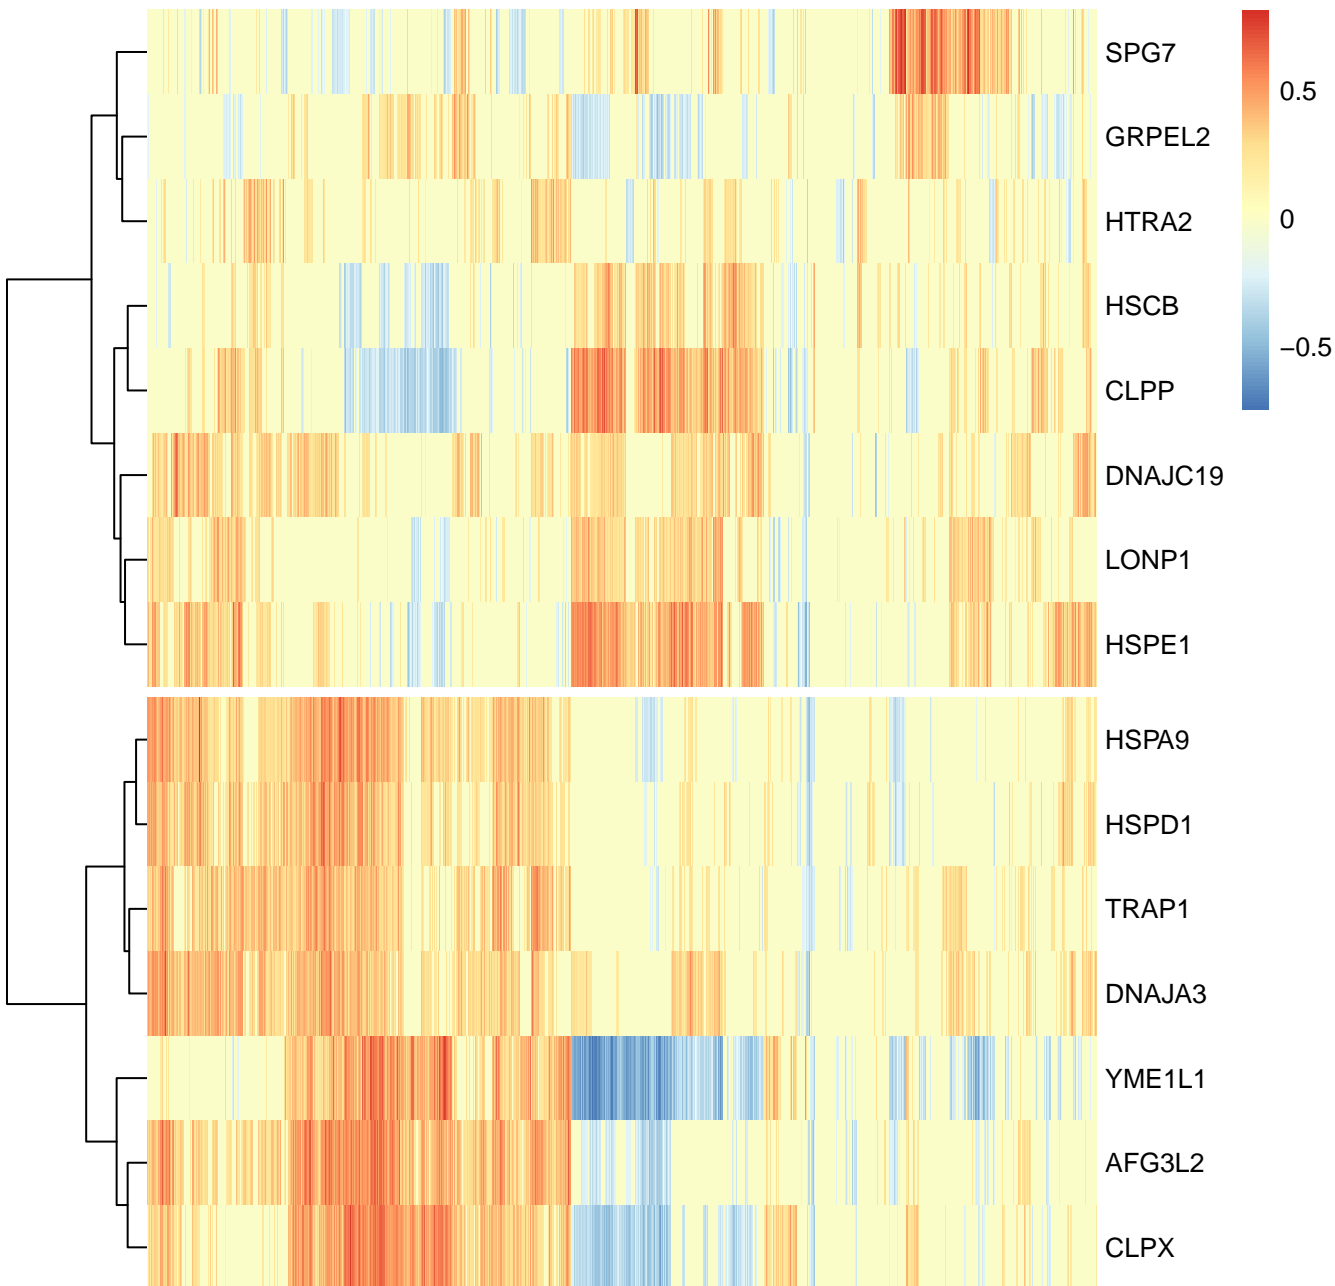

**Kidney\_Renal\_Papillary\_Cell\_Carcinoma Tissue Heatmap**

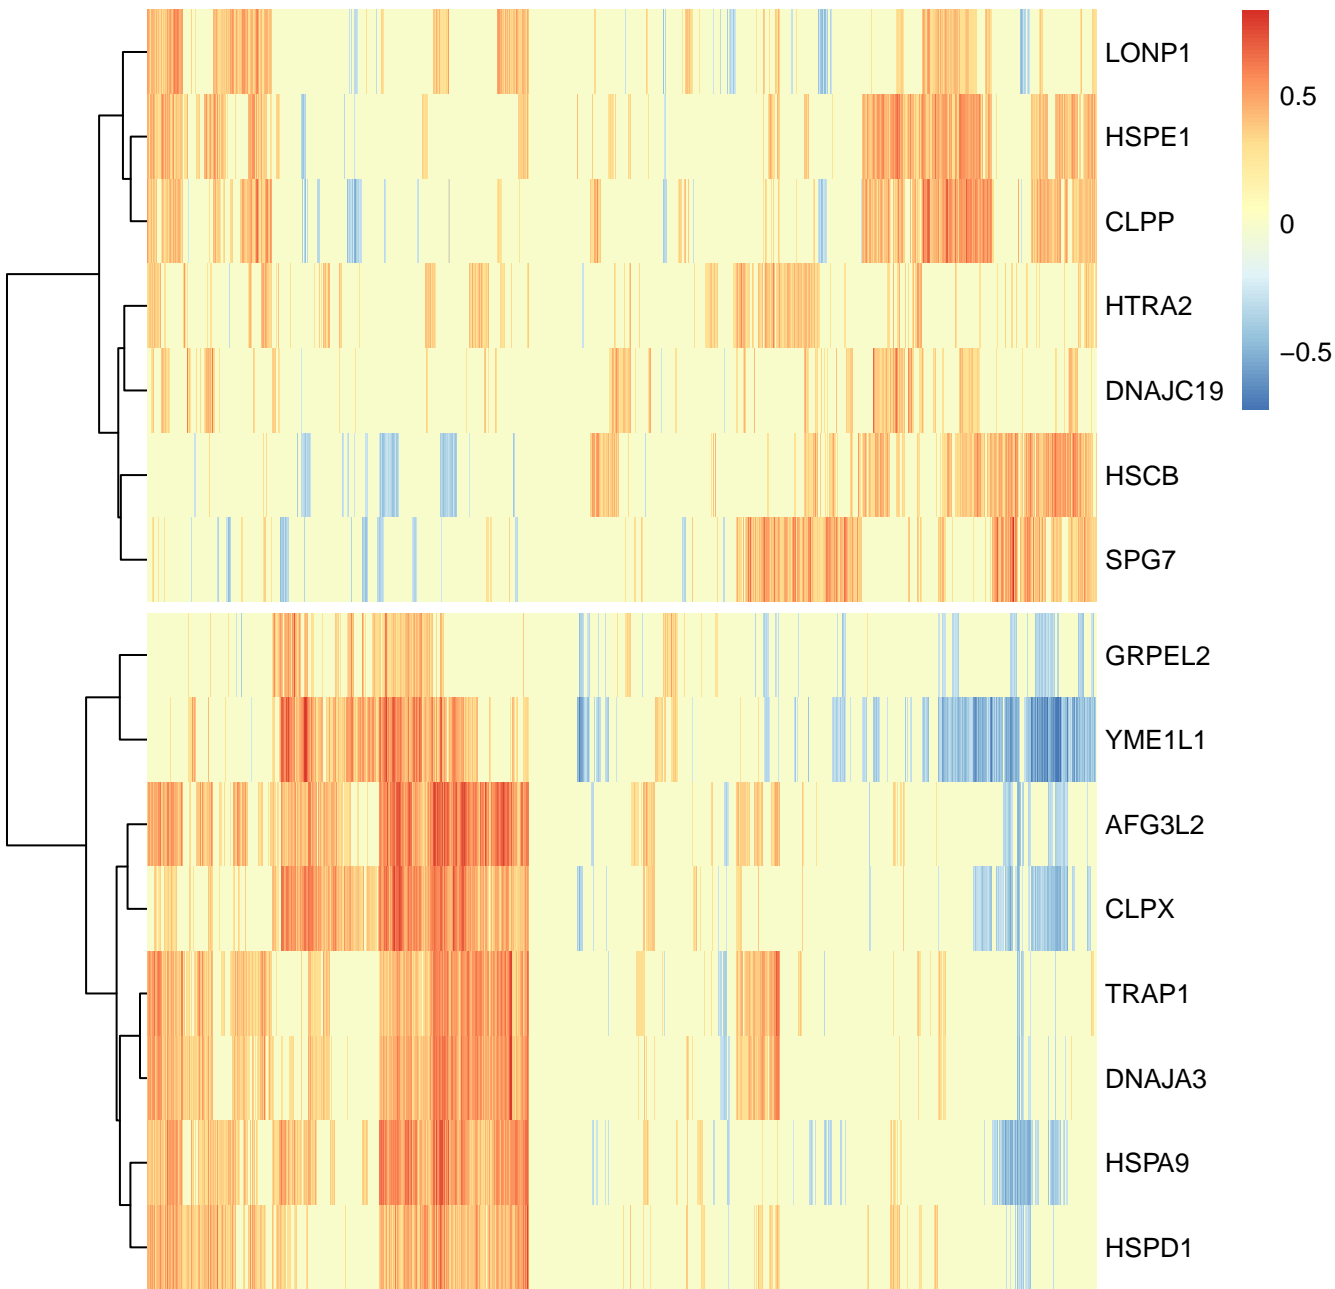

## Liver\_Hepatocellular\_Carcinoma Tissue Heatmap

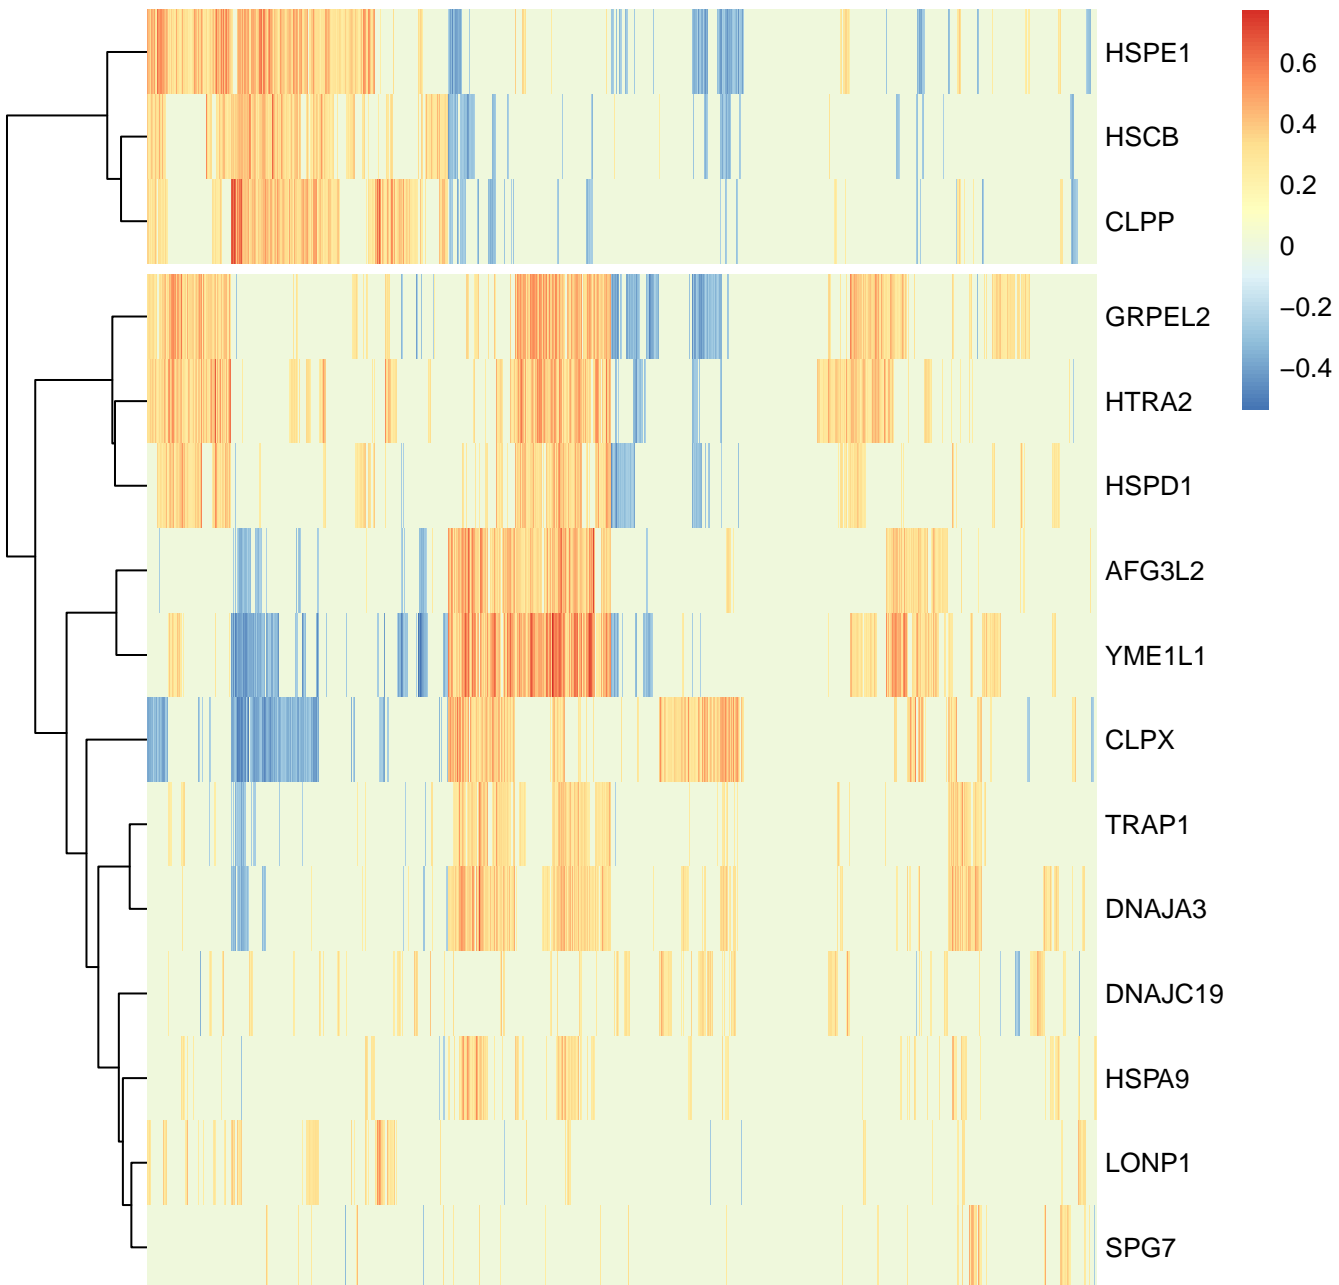

**Lung\_Adenocarcinoma Tissue Heatmap**

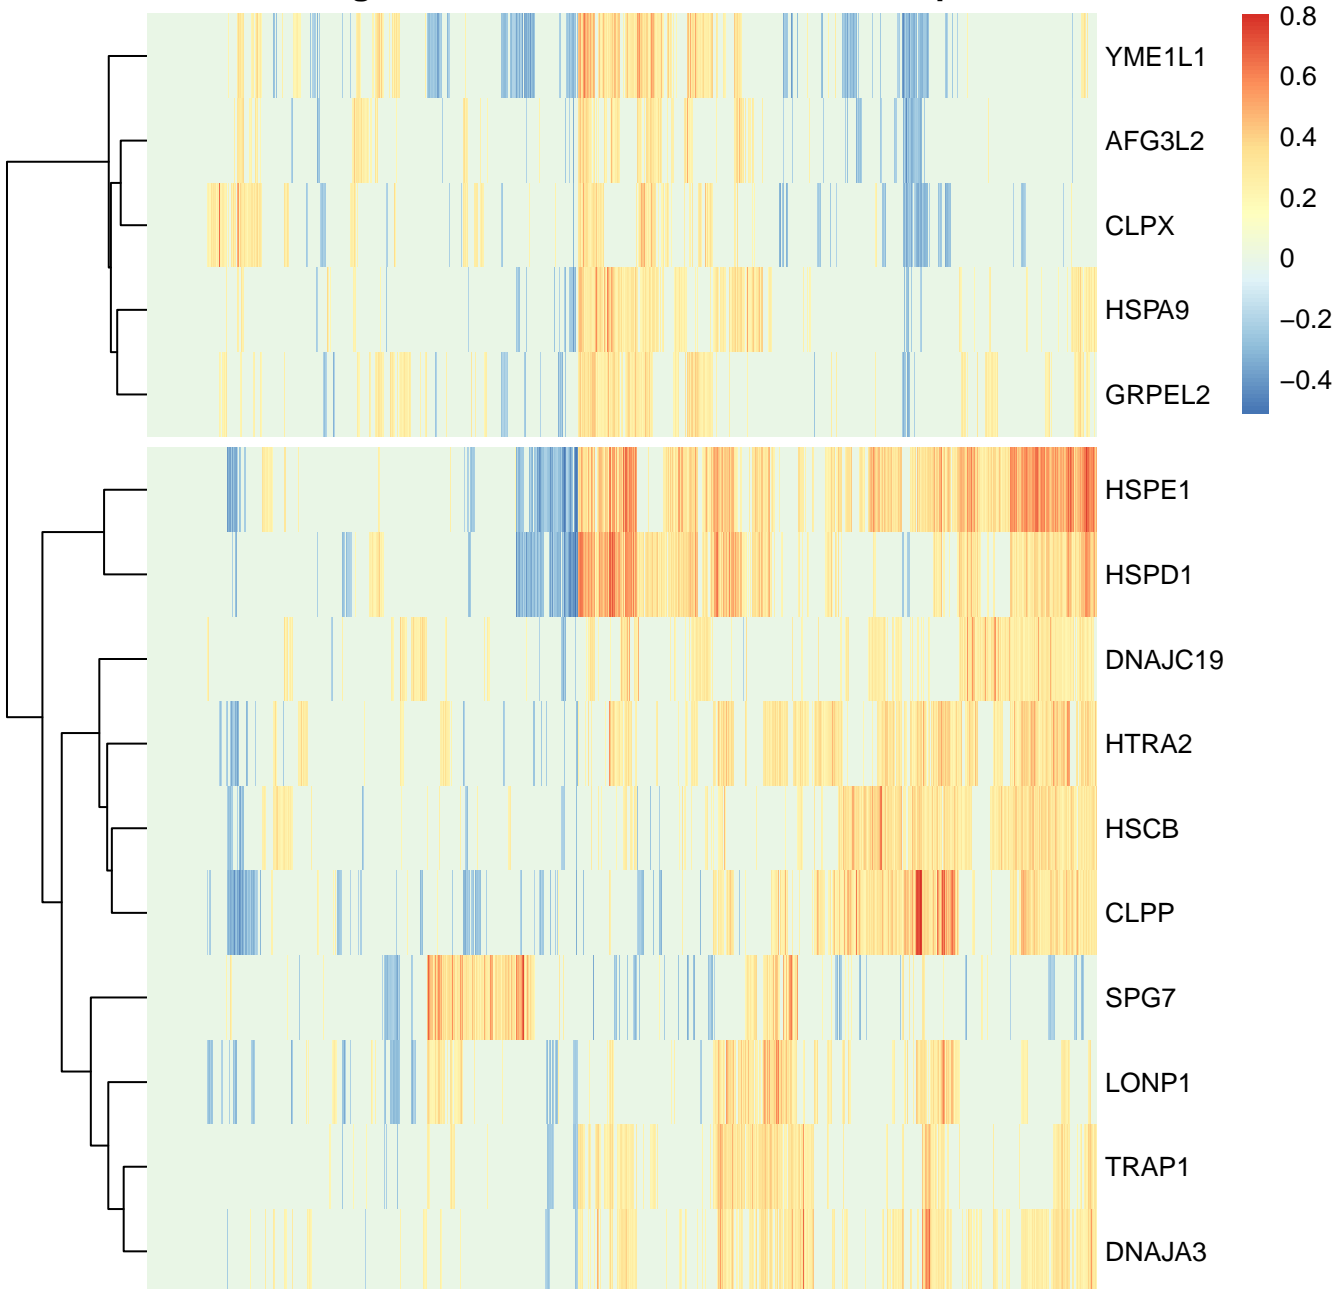



**Lung\_Squamous\_Cell\_Carcinoma Tissue Heatmap**

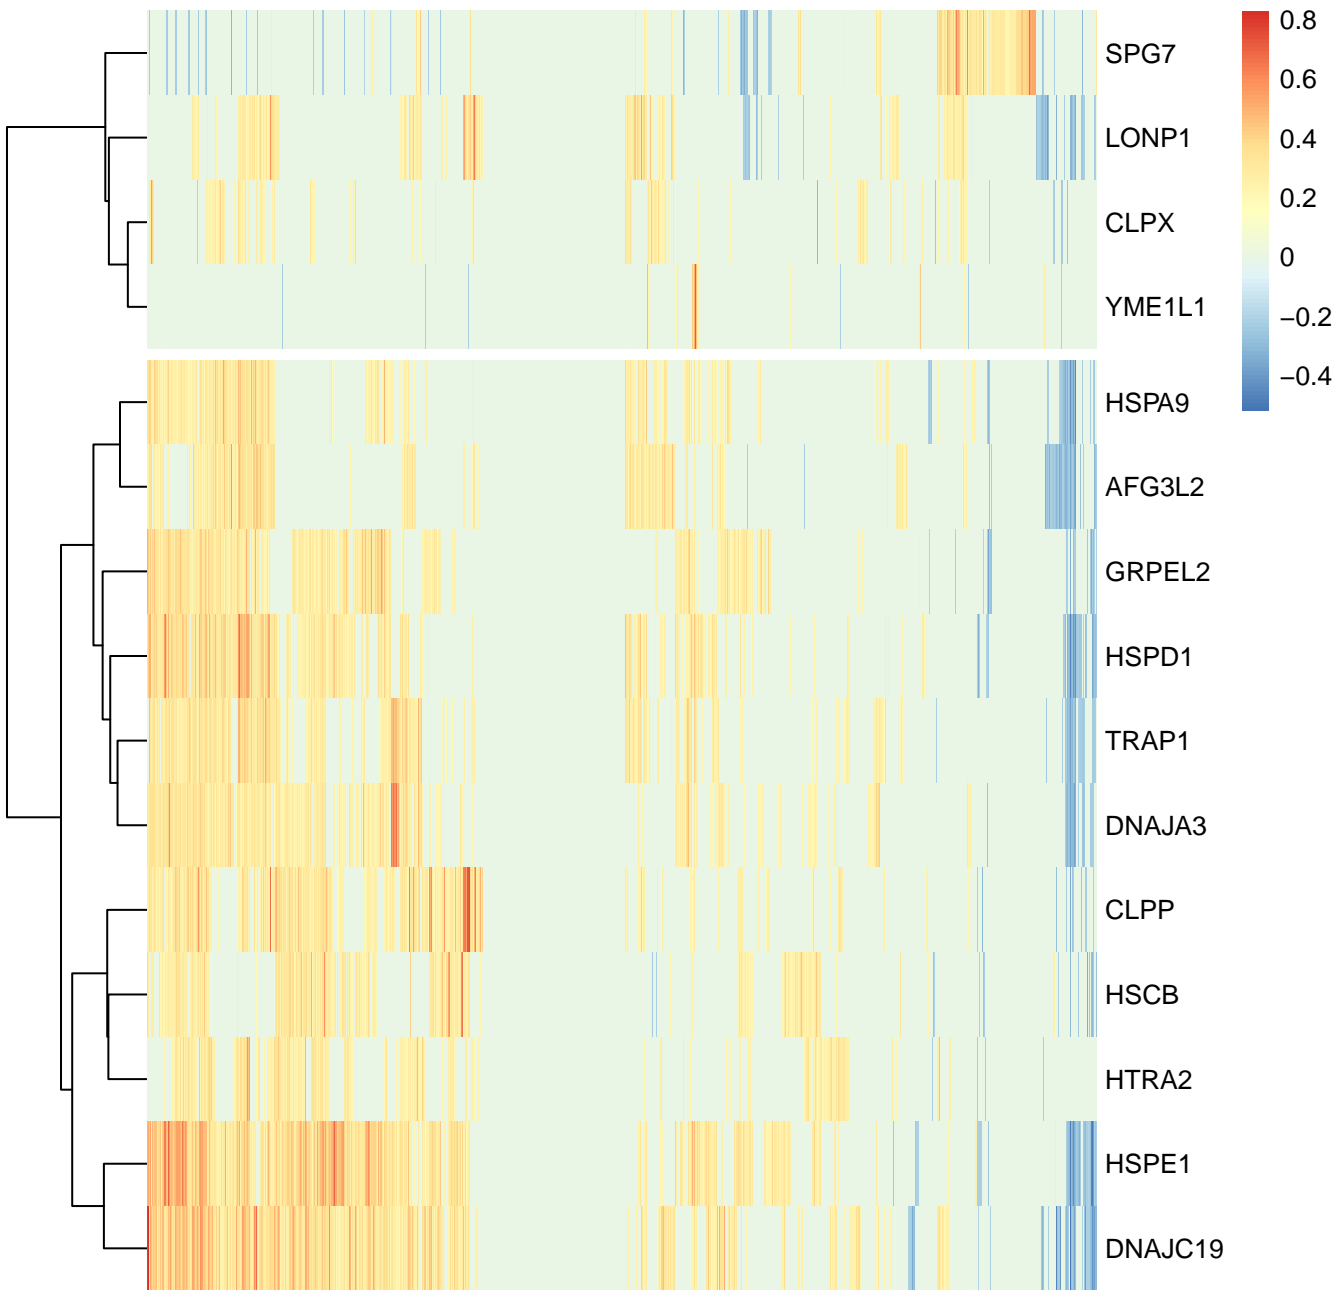

Prostate\_Adenocarcinoma Tissue Heatmap

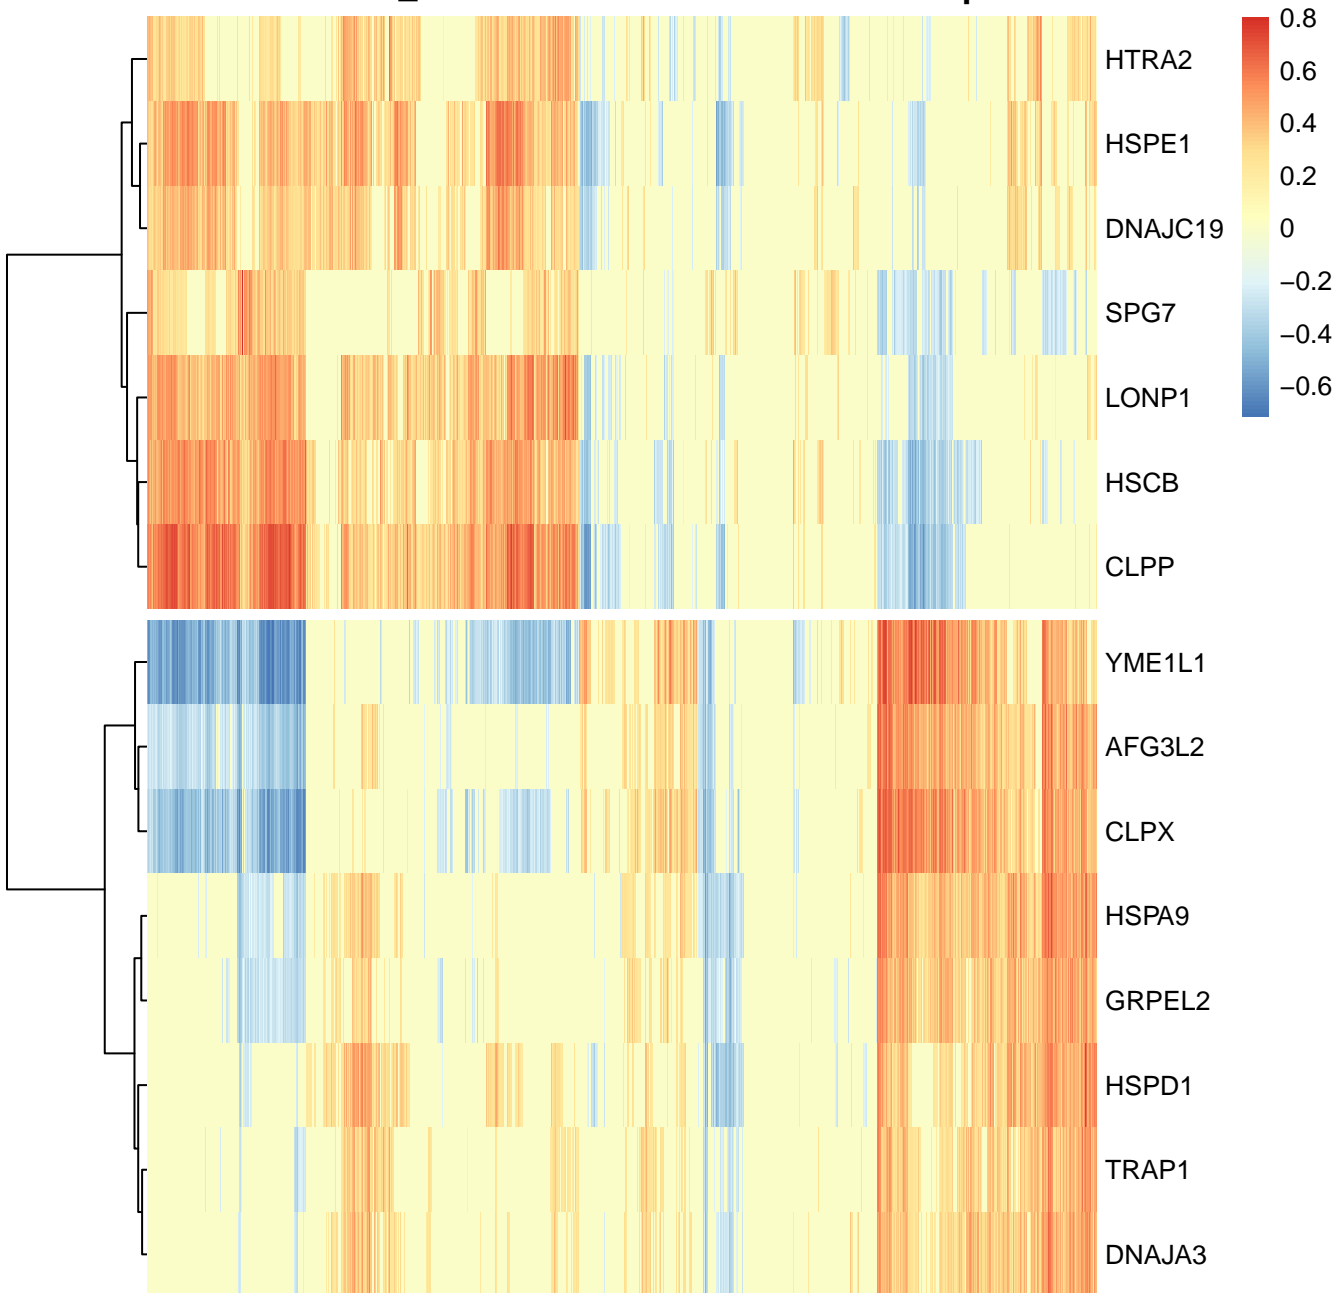

Stomach\_Adenocarcinoma Tissue Heatmap

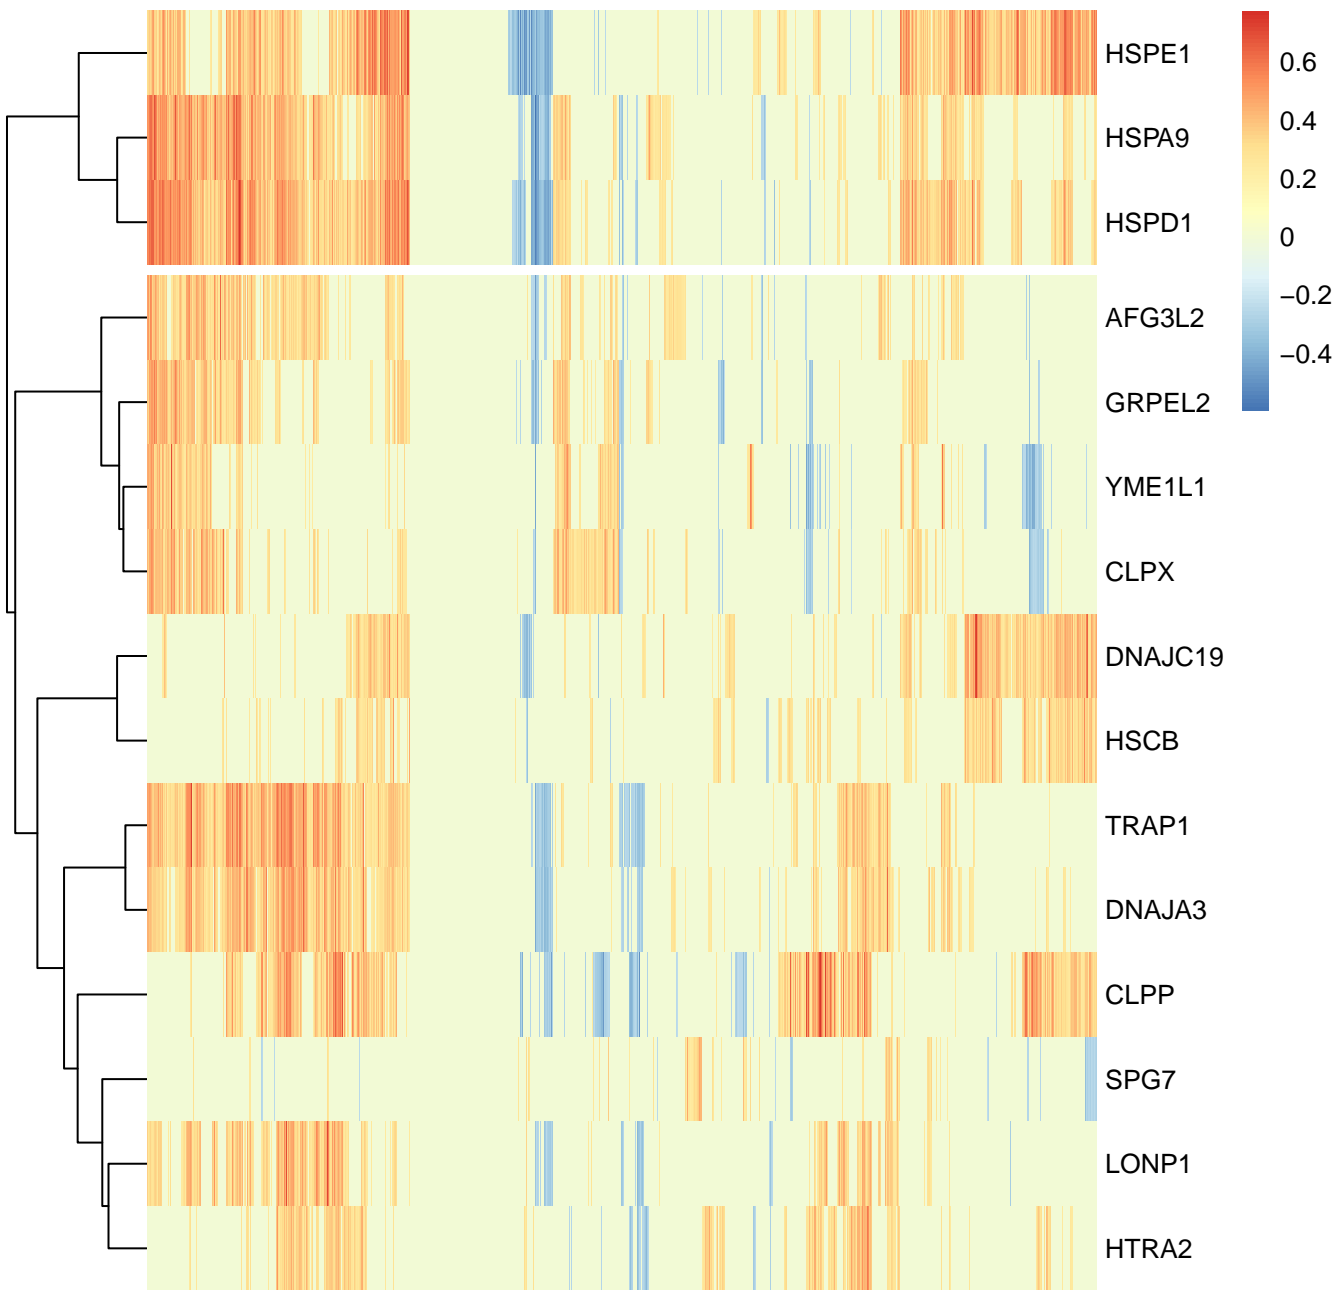

Thyroid\_Carcinoma Tissue Heatmap

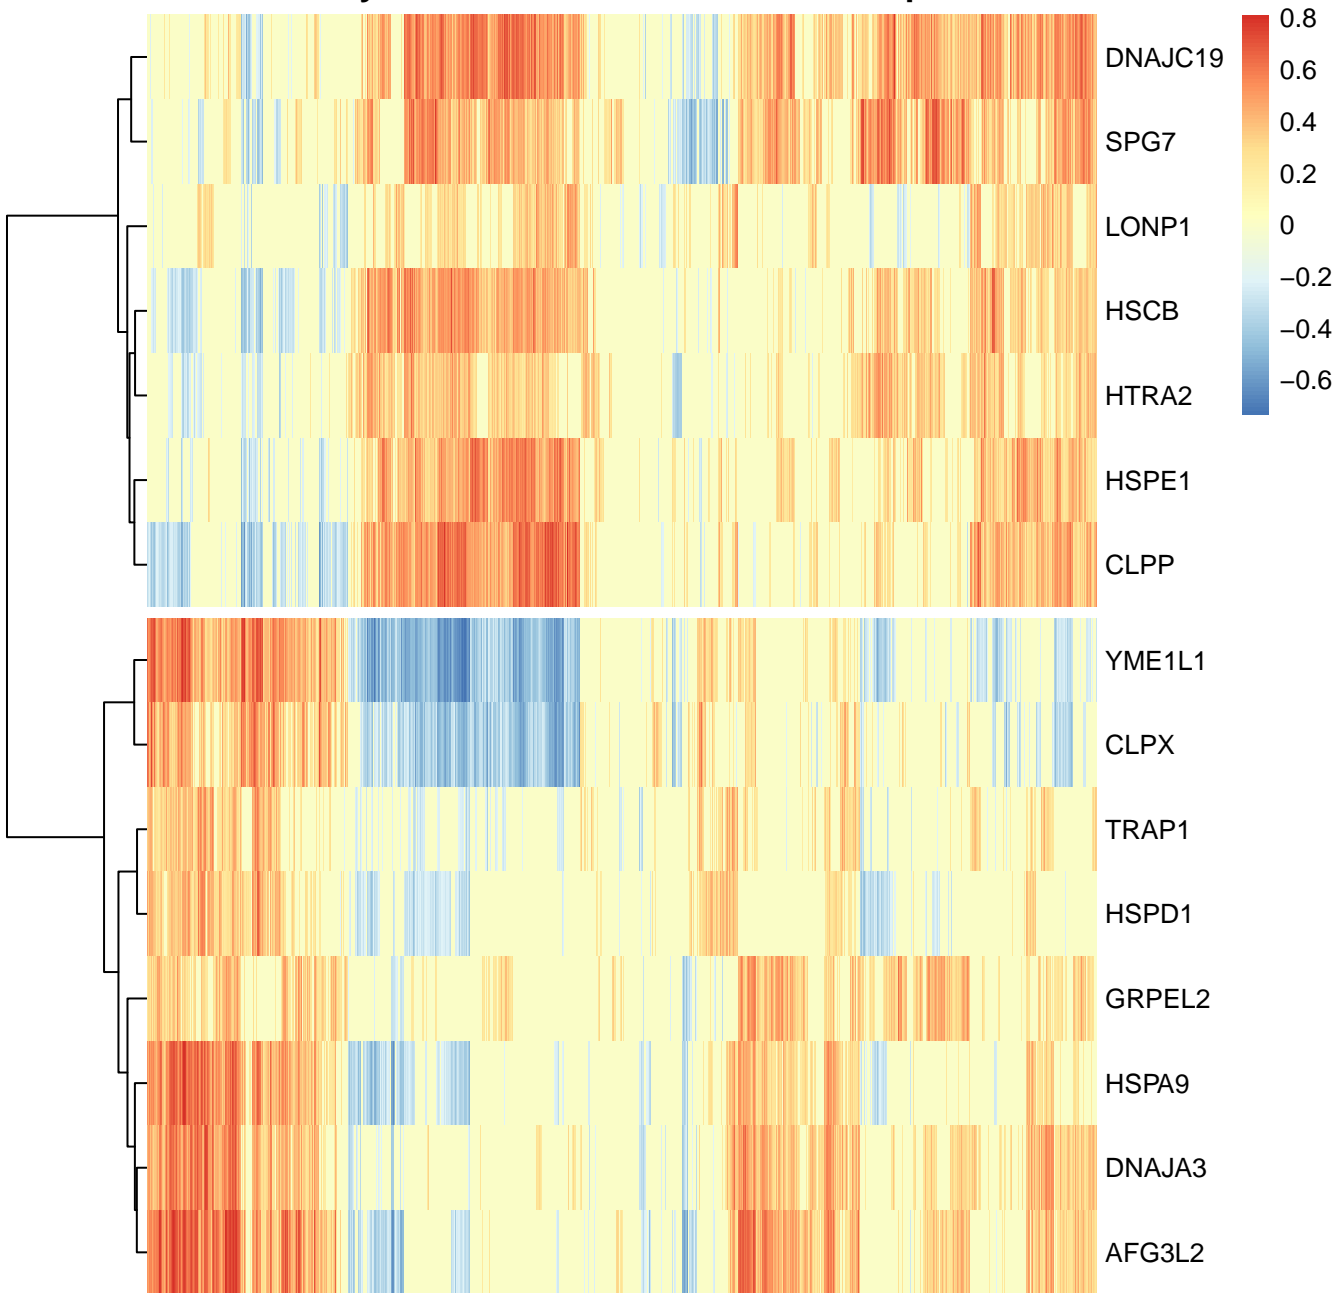

# Uterine\_Corpus\_Endometrial\_Carcinoma Tissue Heatmap

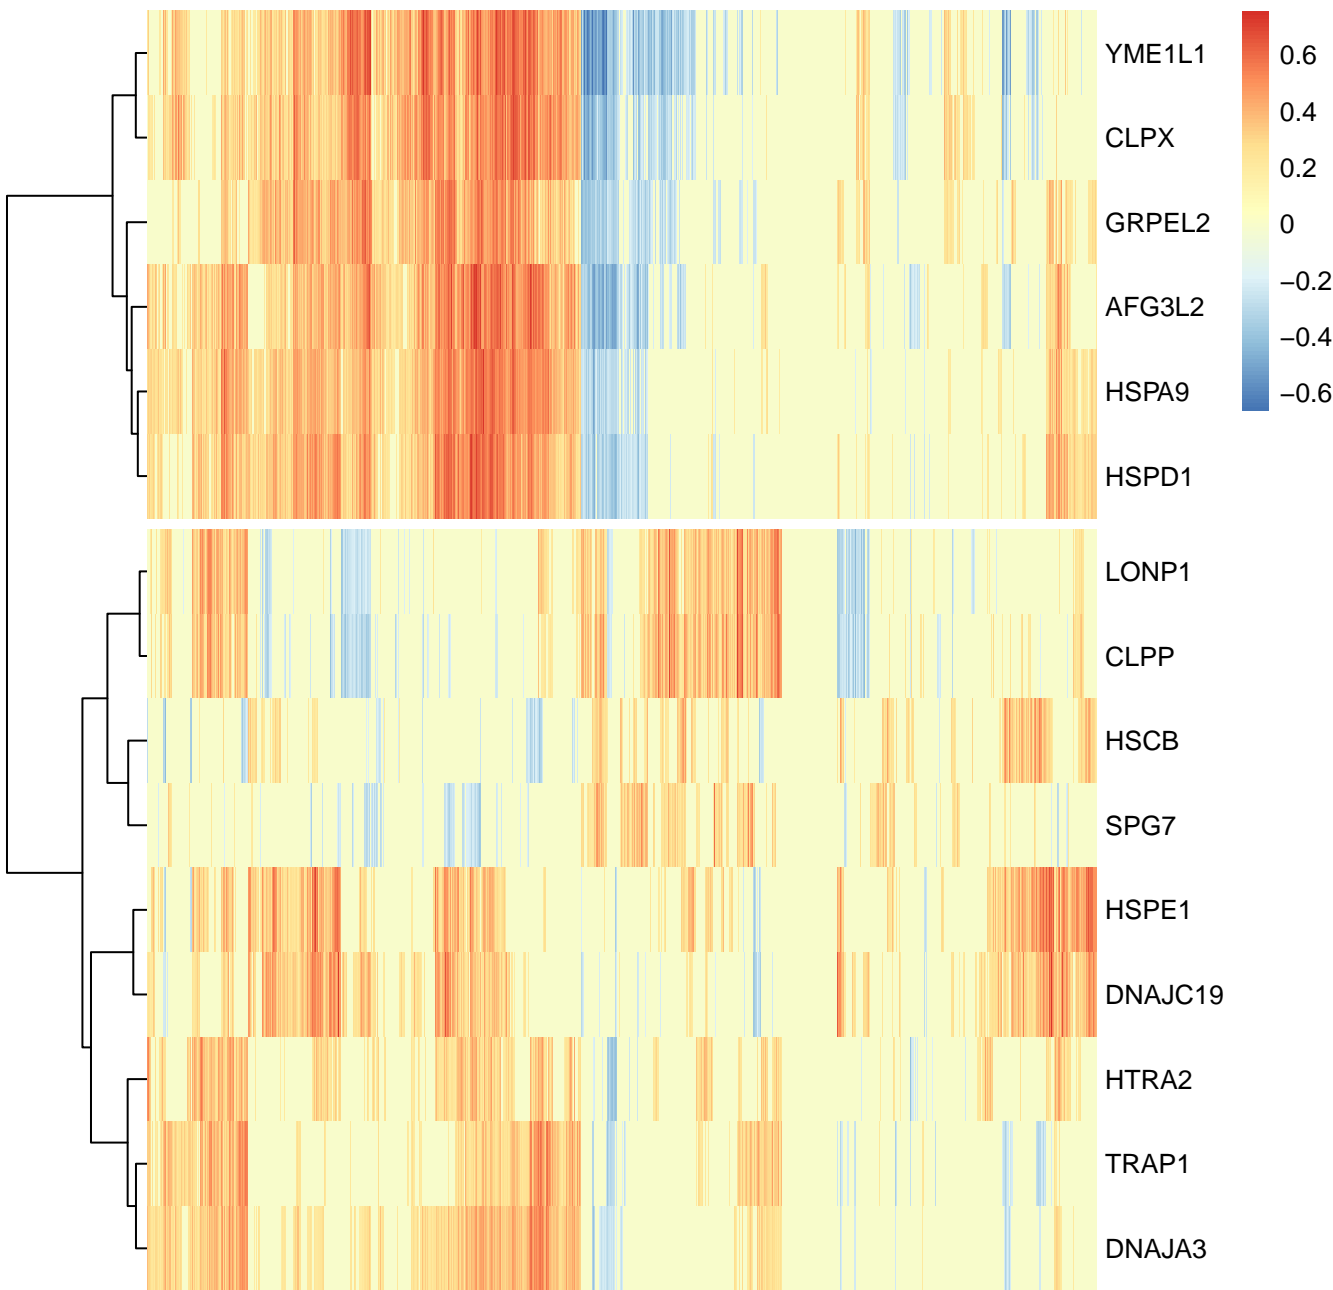

Supplement: s1 [file s1]
