# Supplementary figures and images for: Pan-Cancer Analysis of Mitochondria Chaperone-Client Co-Expression Reveals Chaperone Functional Partitioning
Source: MDPI journal article supplement (doi:10.3390/cancers12040825), 2020-03-30

# Frequency histogram of simulated L values

observed L value: 7.47

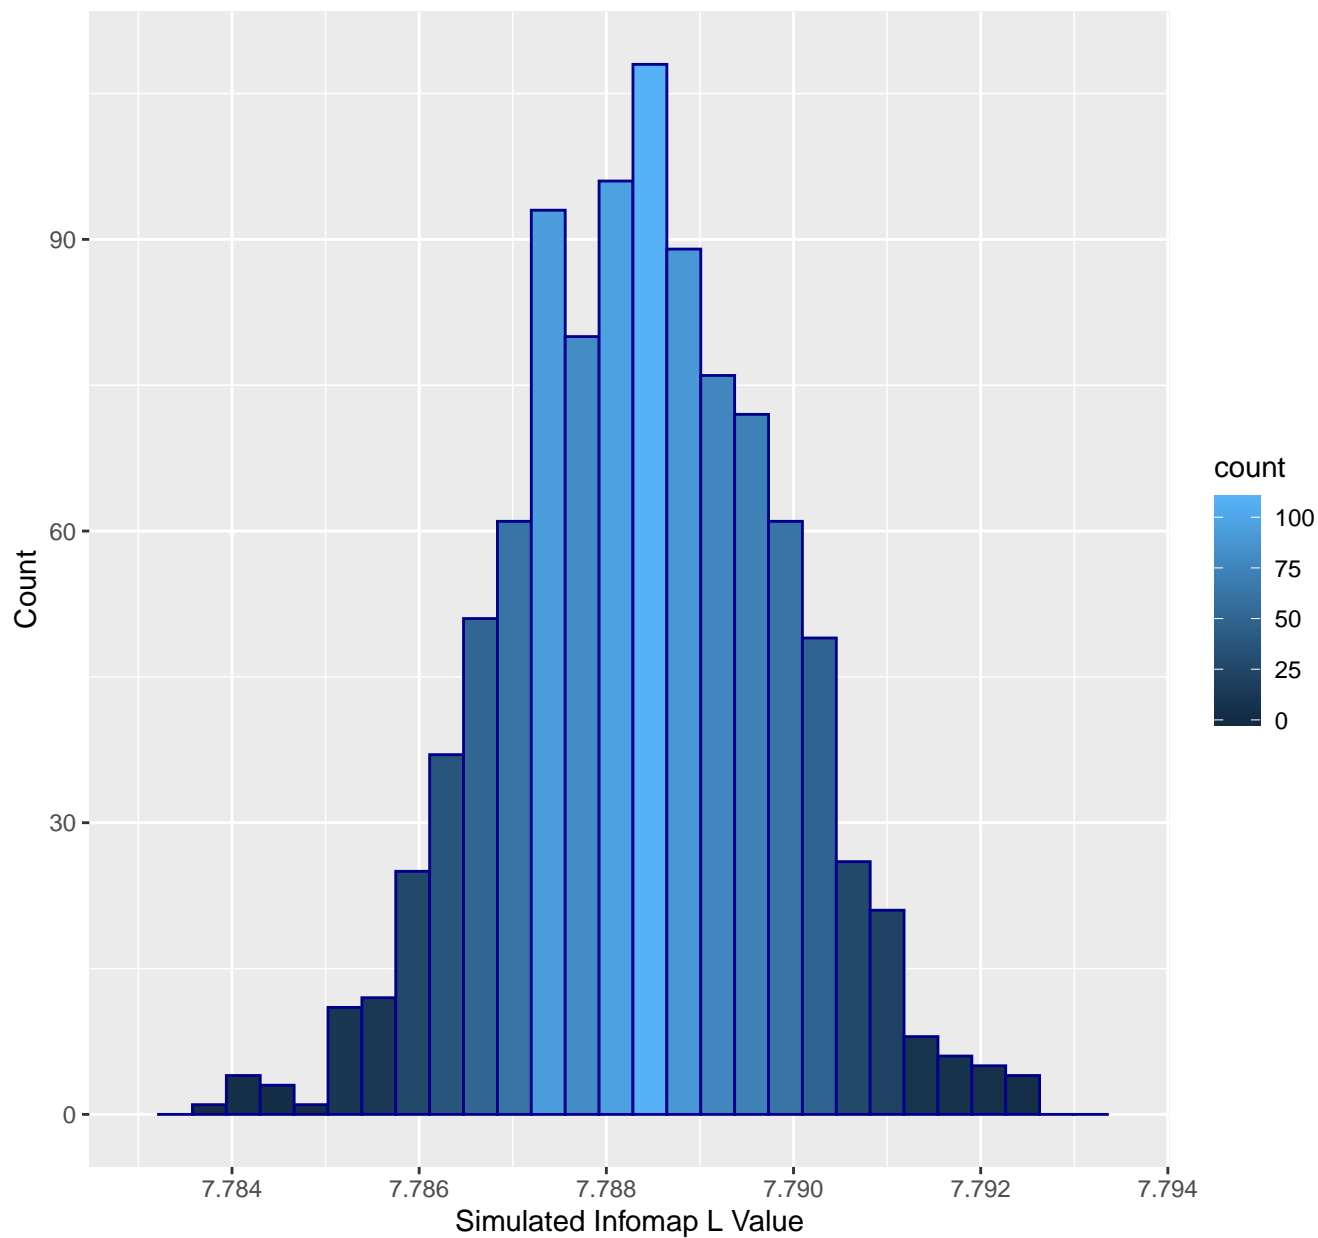

Supplement: s1 [file s1]

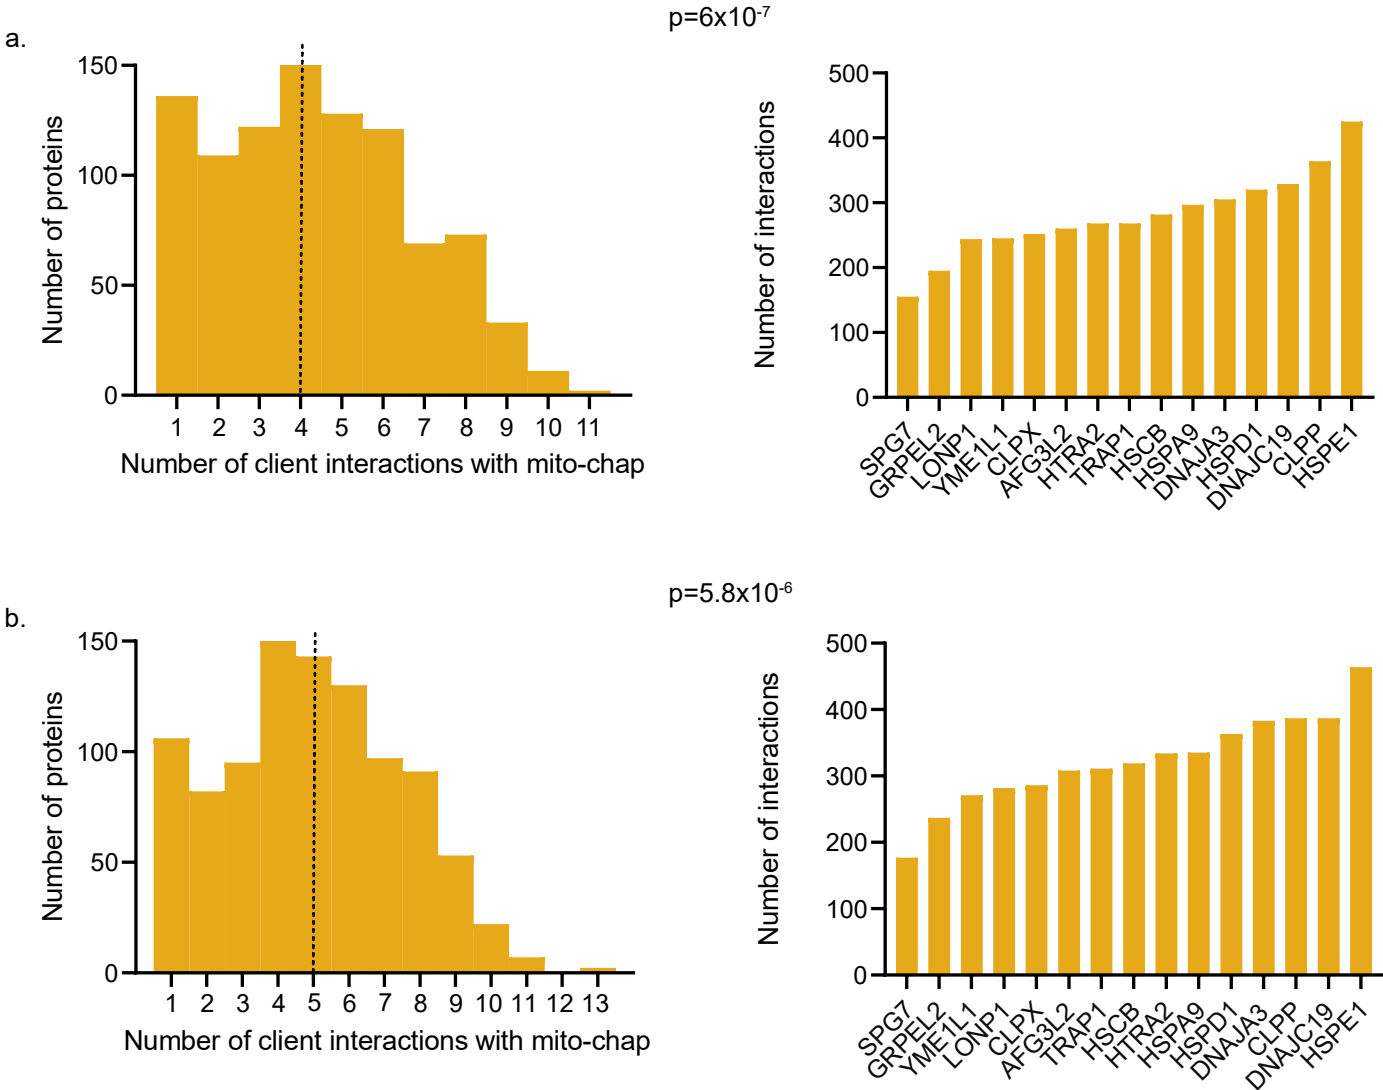

Supplement: s1 [file s1]

Count of R Values in Cancer

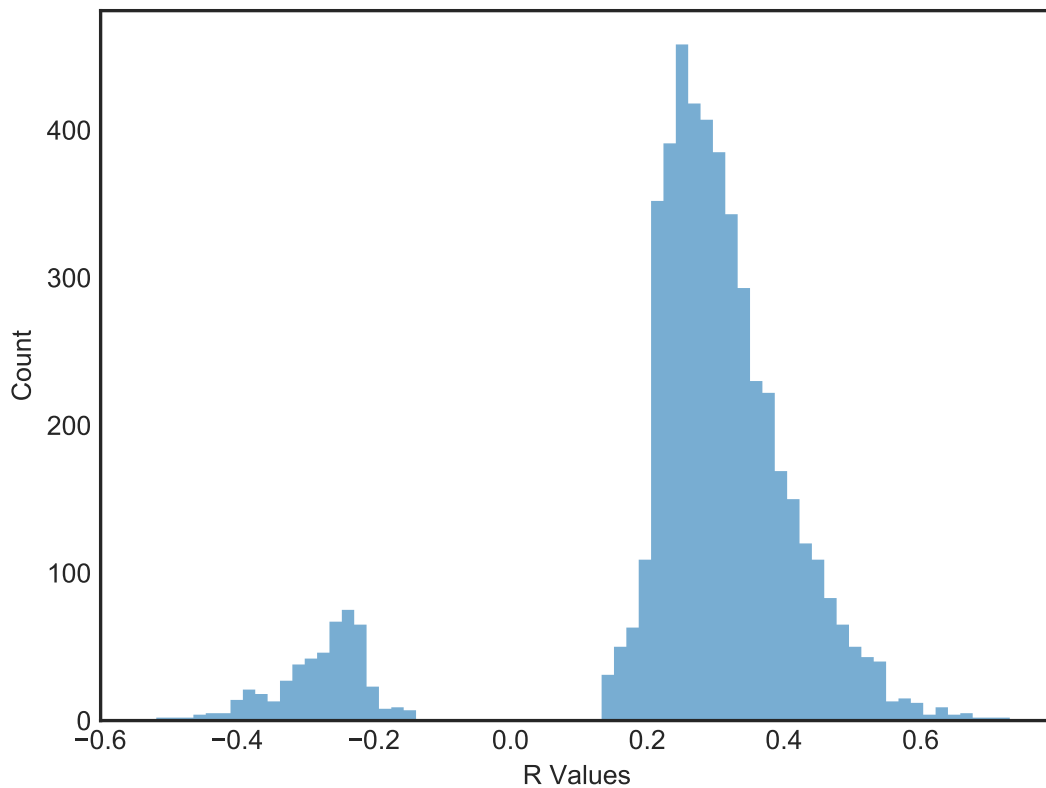

Supplement: s1 [file s1]
